# Supplementary material for: A multi-model analysis of teleconnected crop yield variability in a range of cropping systems
Source: Copernicus journal article supplement (doi:10.5194/esd-11-113-2020), 2020-02-11
Supplement: Supplementary file 1 [file esd-11-113-2020-supplement.zip]

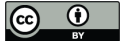

## *Supplement of*

# **A multi-model analysis of teleconnected crop yield variability in a range of cropping systems**

**Matias Heino et al.**

*Correspondence to:* Matias Heino ([matias.heino@aalto.fi](mailto:matias.heino@aalto.fi)) and Matti Kummu ([matti.kummu@aalto.fi](mailto:matti.kummu@aalto.fi))

- [esd-11-113-2020-supplement-title-page.pdf](#)
- [heino\\_et\\_al\\_supplement\\_updated.pdf](#)
- [supplementary\\_zip\\_file.zip](#)

The copyright of individual parts of the supplement might differ from the CC BY 4.0 License.
